# Supplementary material for: Formation of monomeric Sn(ii) and Sn(iv) perfluoropinacolate complexes and their characterization by 119Sn Mössbauer and 119Sn NMR spectroscopies
Source: Royal Society of Chemistry journal article supplement (doi:10.1039/d0dt02837a), 2020-01-01
Supplement: d0dt02837a1.pdf [file d0dt02837a1.pdf]

Supporting Information for

**Formation of Monomeric Sn(II) and Sn(IV) Perfluoropinacolate Complexes and their Characterization by  $^{119}\text{Sn}$  Mössbauer and  $^{119}\text{Sn}$  NMR Spectroscopies**

Jessica K. Elinburg,<sup>a</sup> Ariel S. Hyre,<sup>a</sup> James McNeely,<sup>a</sup> Todd M. Alam,<sup>b</sup> Steffen Klenner,<sup>c</sup> Rainer Pöttgen,<sup>c</sup> Arnold L. Rheingold,<sup>d</sup> and Linda H. Doerrer<sup>a</sup>

<sup>a</sup> Department of Chemistry, Boston University, 590 Commonwealth Avenue, Boston, MA 02215, USA. Email: [doerrer@bu.edu](mailto:doerrer@bu.edu).

<sup>b</sup> Department of Organic Material Science, Sandia National Laboratories, Albuquerque, NM 87185, USA.

<sup>c</sup> Institut für Anorganische und Analytische Chemie, Universität Münster, Corrensstrasse 30, D-48149 Münster, Germany.

<sup>d</sup> Department of Chemistry and Biochemistry, University of California, San Diego, 9500 Gilman Drive, MC 0332, La Jolla, CA 92093, USA.

Table of Contents

|                   |                                                                                                              |        |
|-------------------|--------------------------------------------------------------------------------------------------------------|--------|
| <b>Figure S1</b>  | ORTEP of <b>1</b>                                                                                            | Pg. 2  |
| <b>Figure S2</b>  | ORTEP of <b>2</b>                                                                                            | Pg. 3  |
| <b>Figure S3</b>  | ORTEP of <b>3</b>                                                                                            | Pg. 4  |
| <b>Figure S4</b>  | ORTEP of <b>4</b>                                                                                            | Pg. 5  |
| <b>Figure S5</b>  | ORTEP of <b>5</b>                                                                                            | Pg. 6  |
| <b>Figure S6</b>  | $^{119}\text{Sn}$ Mössbauer spectra of <b>2</b> and <b>3</b>                                                 | Pg. 7  |
| <b>Figure S7</b>  | Variable-temperature $^{19}\text{F}$ NMR spectra of <b>1-5</b>                                               | Pg. 8  |
| <b>Figure S8</b>  | Electrostatic potential maps for <b>5</b> and $\text{Sn}[\text{C}_6\text{H}_3(\text{NMe}_2)_2\text{-2,6}]_2$ | Pg. 9  |
| <b>Figure S9</b>  | Calculated $5p_x$ energies of four-coordinate Sn(II) complexes                                               | Pg. 10 |
| <b>Table S1</b>   | Crystal data and structure refinement for <b>1-5</b>                                                         | Pg. 11 |
| <b>Table S2</b>   | $^{119}\text{Sn}$ Mössbauer data from Figure 3 in main text                                                  | Pg. 13 |
|                   | Computational details                                                                                        | Pg. 15 |
| <b>Table S3</b>   | Summary of correlation plots of exp. $ \Delta E $ ( $\text{mm s}^{-1}$ ) vs. calc. values of $ V $ (a.u.)    | Pg. 15 |
| <b>Table S4</b>   | Summary of model performance                                                                                 | Pg. 15 |
| <b>Figure S10</b> | Calibration curve for DLPNO-CCSD/cc-pwCVTZ-DK(Sn)/cc-pVTZ-DK/DKH/RIJCOSX/AutoAux//Expt.                      | Pg. 16 |
| <b>References</b> |                                                                                                              | Pg. 17 |

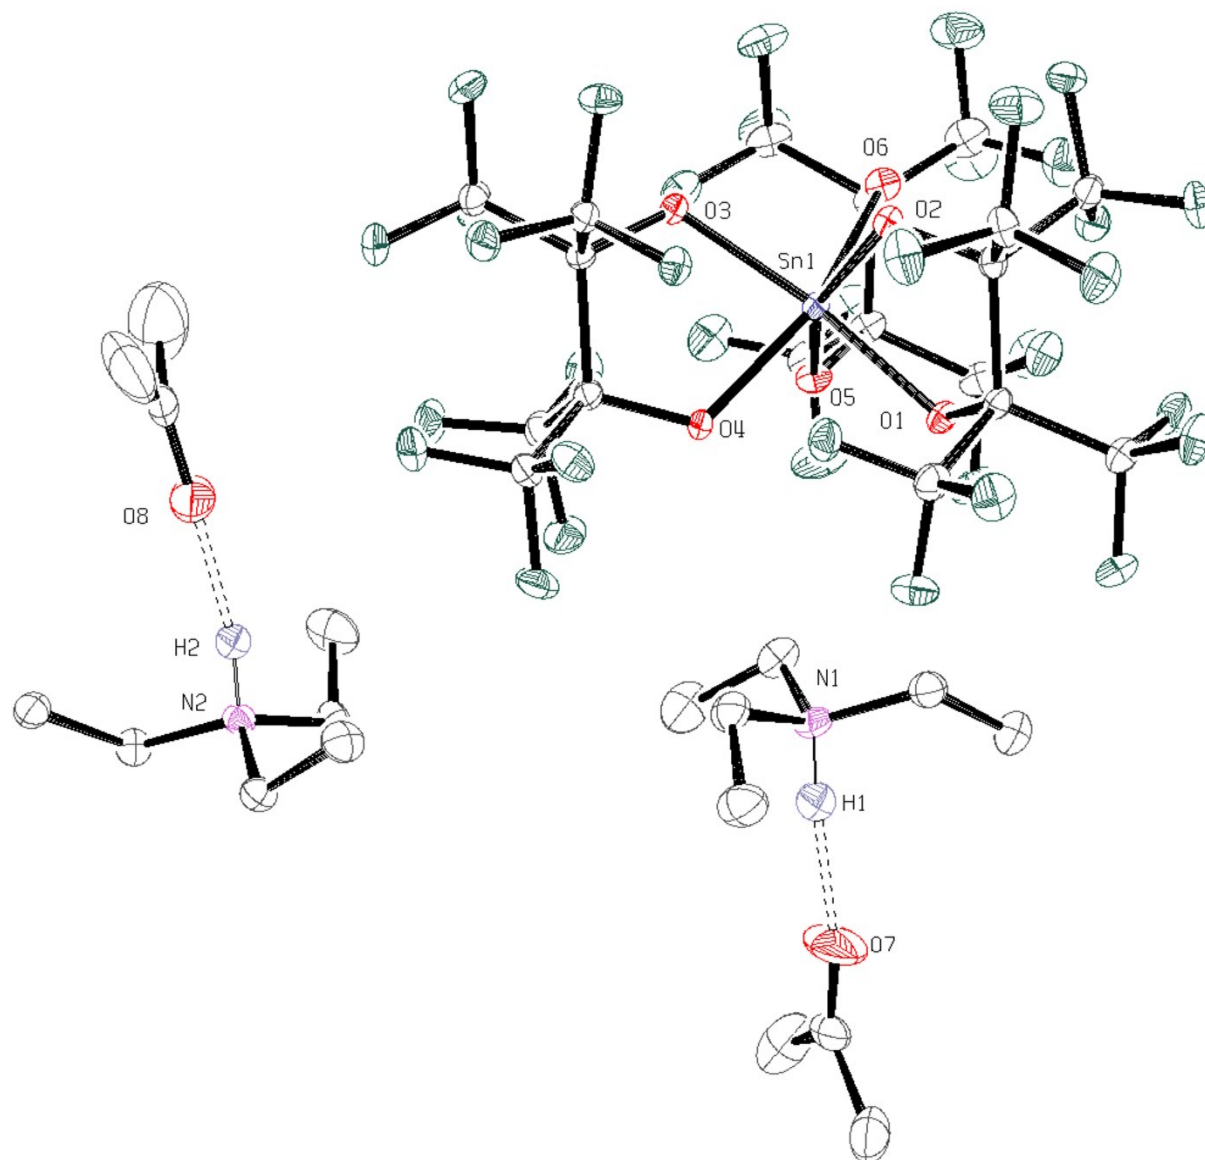

**Figure S1.** ORTEP of **1**. Ellipsoids shown at the 50% probability level. Hydrogen atoms, except those involved in hydrogen bonding, omitted for clarity.

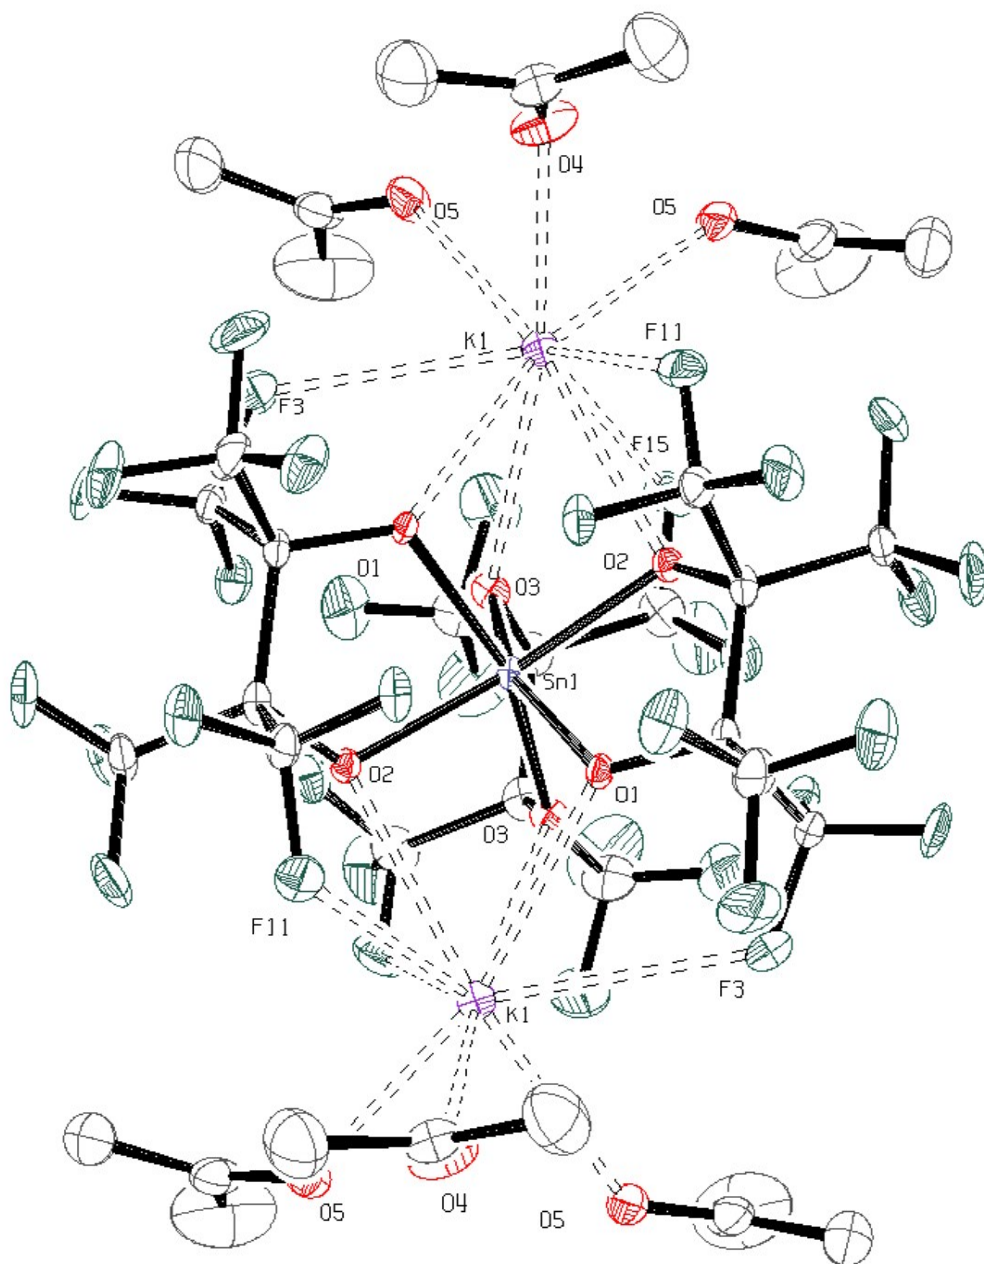

**Figure S2.** ORTEP of **2**. Ellipsoids shown at the 50% probability level. Hydrogen atoms omitted for clarity.  $K_2[Sn(pin^F)_3]$  crystallizes with three equivalents of  $(CH_3)_2CO$  per molecule (effectively  $1.5/K^+$ ); these solvent molecules are also bound to the  $K^+$  counter ion of a neighboring Sn center in a repeating pattern. To show this pattern, the coordination of six  $(CH_3)_2CO$  molecules is shown above.

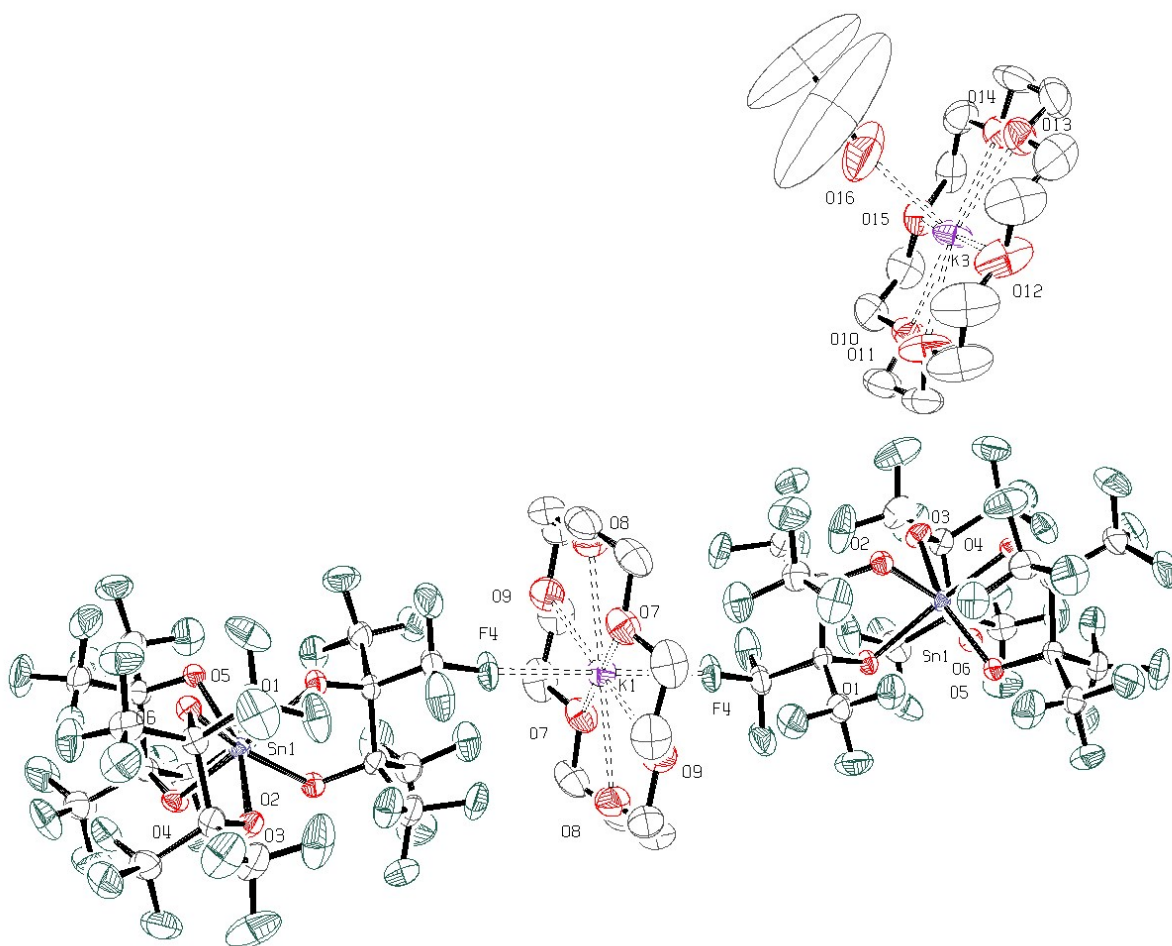

**Figure S3.** ORTEP of **3**. Ellipsoids shown at the 50% probability level. Hydrogen atoms omitted for clarity.  $\{\text{K}(18\text{C}6)\}_2[\text{Sn}(\text{pin}^{\text{F}})_3]$  crystallizes with a single equivalent of  $(\text{CH}_3)_2\text{CO}$  per molecule, coordinated to one of the  $\{\text{K}(18\text{C}6)\}^+$  counter ions; the other  $\{\text{K}(18\text{C}6)\}^+$  moiety bridges two units of **3** via  $\text{K}\cdots\text{F}$  interactions in a repeating pattern. To show these  $\text{K}\cdots\text{F}$  interactions, two Sn(IV) centers of **3** are shown above.

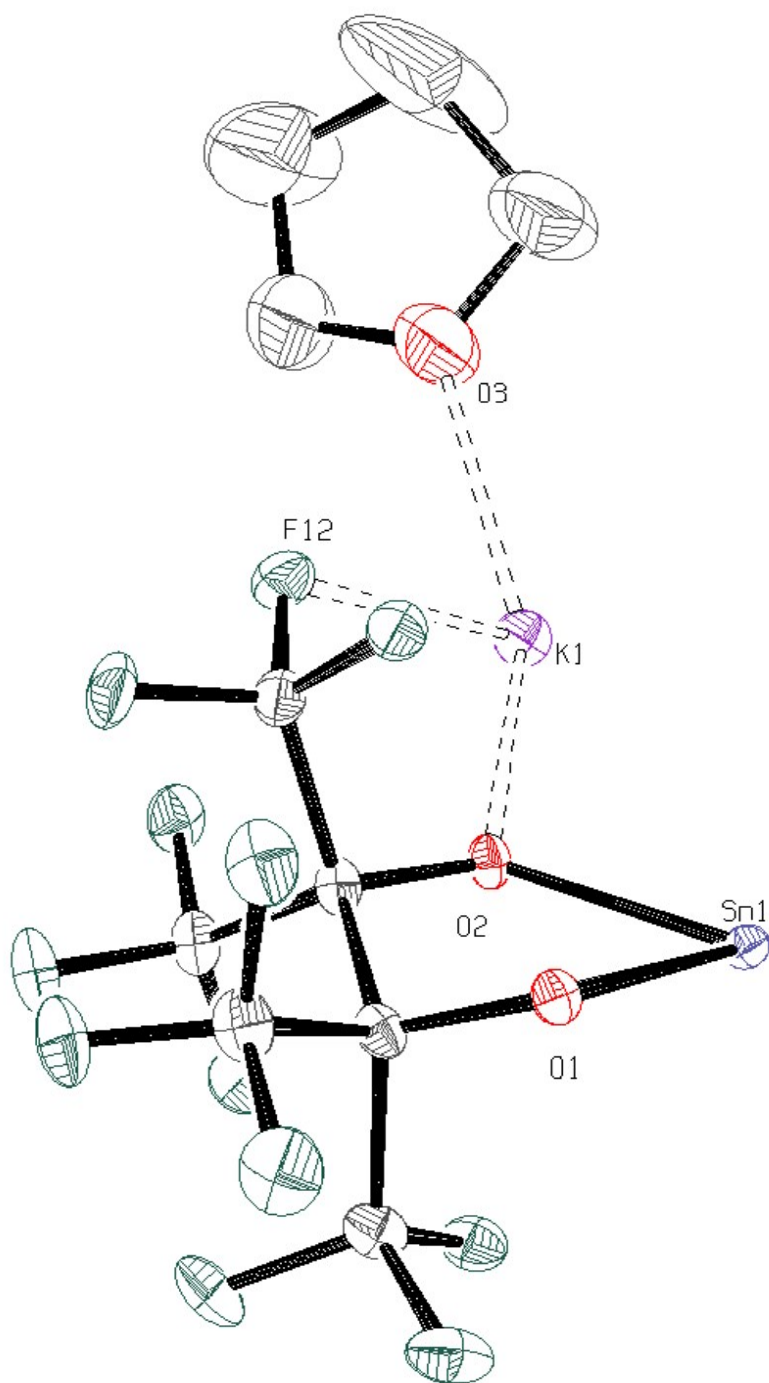

**Figure S4.** ORTEP of the asymmetric unit of **4**, which represents half of the  $\text{K}_2[\text{Sn}(\text{pin}^{\text{F}})_2] \cdot 2 \text{C}_4\text{H}_8\text{O}$  moiety. Ellipsoids shown at the 50% probability level. Hydrogen atoms omitted for clarity.

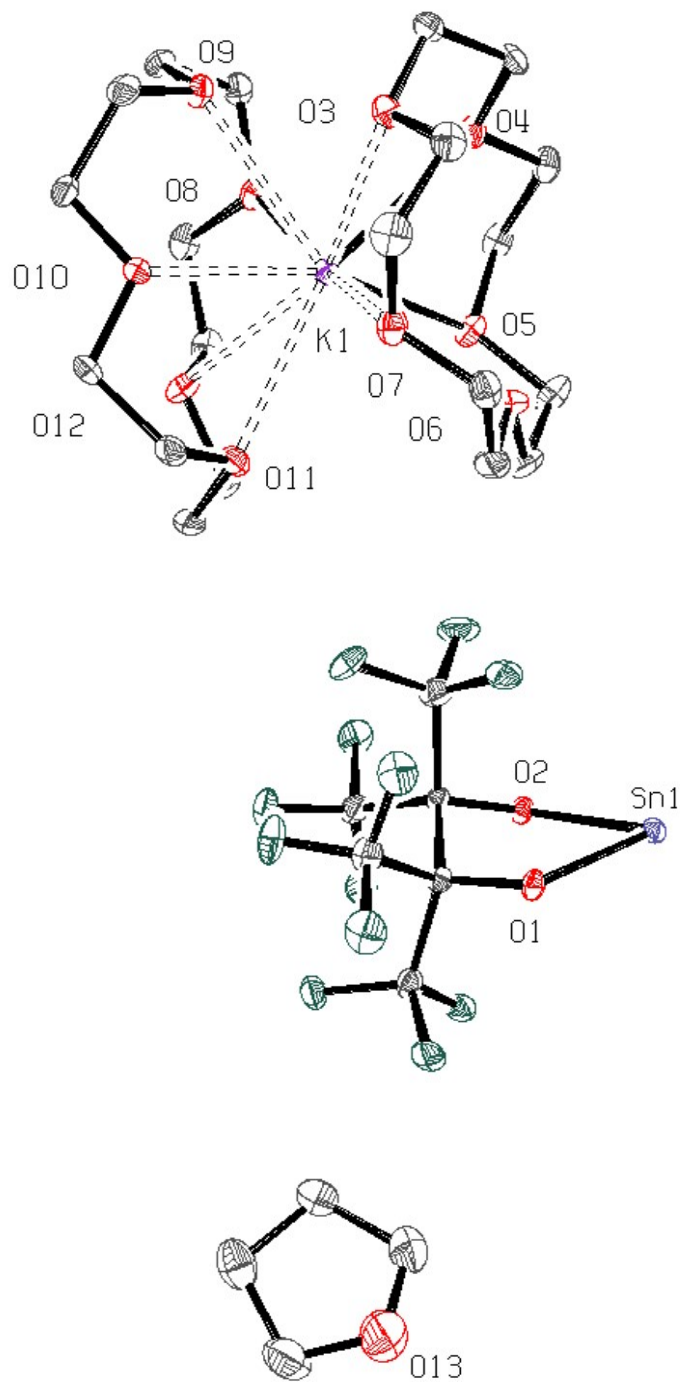

**Figure S5.** ORTEP of the asymmetric unit of **5**, which represents half of the symmetrical  $\{\text{K}(15\text{C}5)\}_2[\text{Sn}(\text{pin}^{\text{F}})_2] \cdot 2 \text{C}_4\text{H}_8\text{O}$  unit. Ellipsoids shown at the 50% probability level. Hydrogen atoms omitted for clarity.

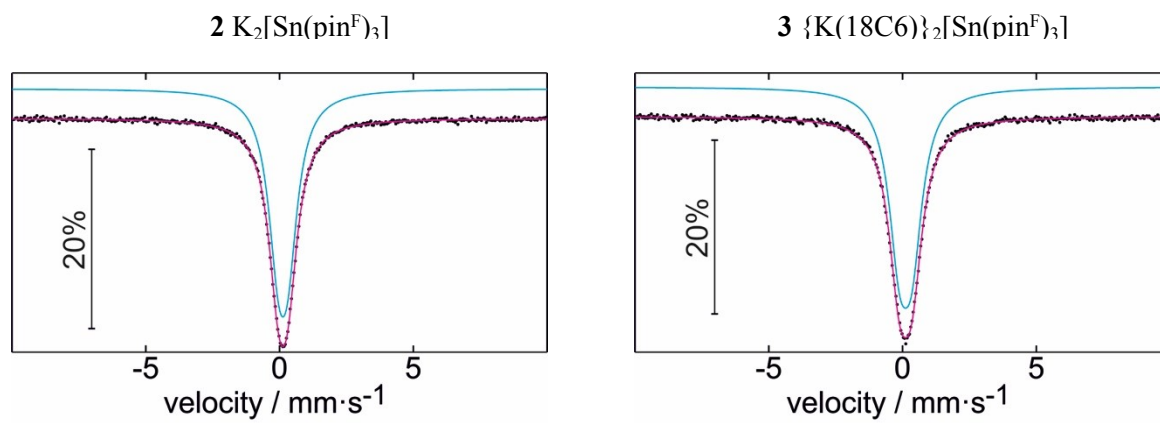

**Figure S6.**  $^{119}\text{Sn}$  Mössbauer spectra of **2** and **3**.

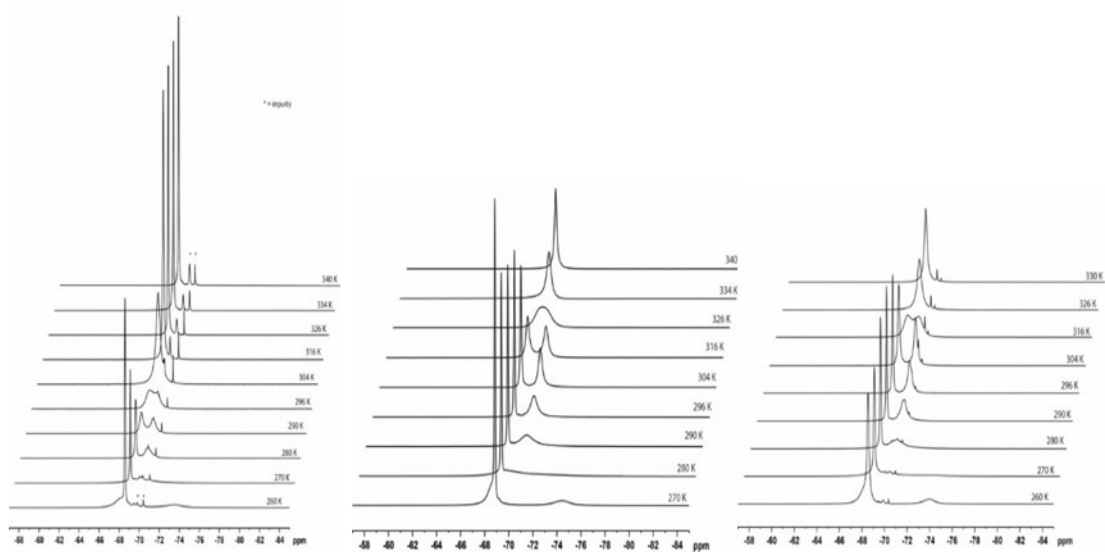

**1**  $[\text{Et}_3\text{NH}]_2[\text{Sn}(\text{pin}^\text{F})_3]$

**2**  $\text{K}_2[\text{Sn}(\text{pin}^\text{F})_3]$

**3**  $\{\text{K}(\text{18C6})\}_2[\text{Sn}(\text{pin}^\text{F})_3]$

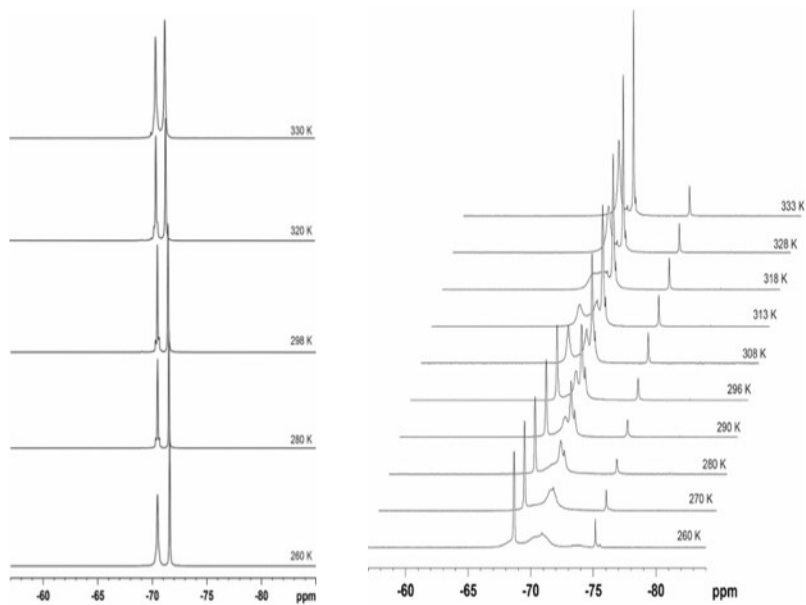

**4**  $\text{K}_2[\text{Sn}(\text{pin}^\text{F})_2]$

**5**  $\{\text{K}(\text{15C5})\}_2[\text{Sn}(\text{pin}^\text{F})_2]$

**Figure S7.** Variable temperature  $^{19}\text{F}$  NMR data for **1-5**.



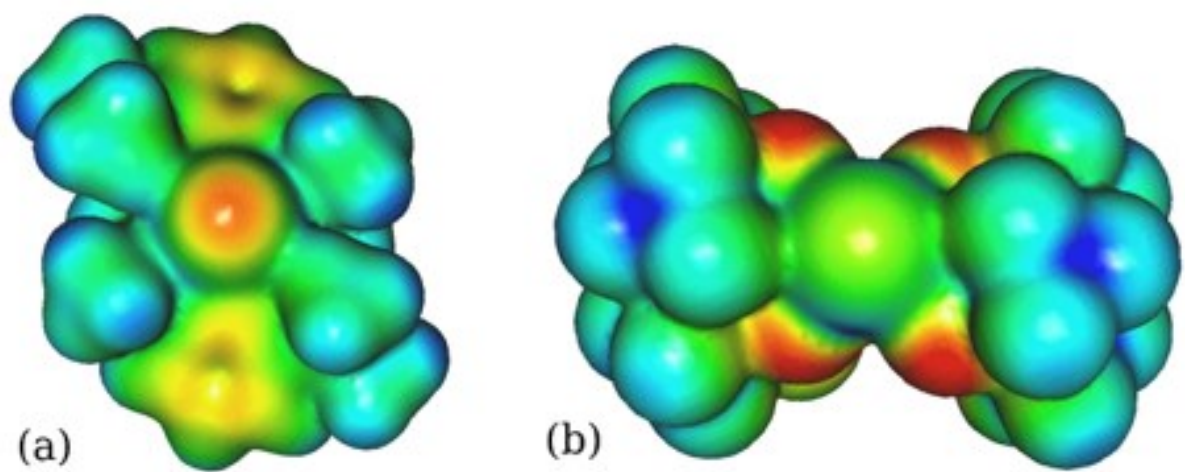

**Figure S8.** Electrostatic potential maps for  $\text{Sn}[\text{C}_6\text{H}_3(\text{NMe}_2)_{2-2,6}]_2$  (-0.06 to 0.06) **(a)** and **5** (-0.17 to 0.28) **(b)**.

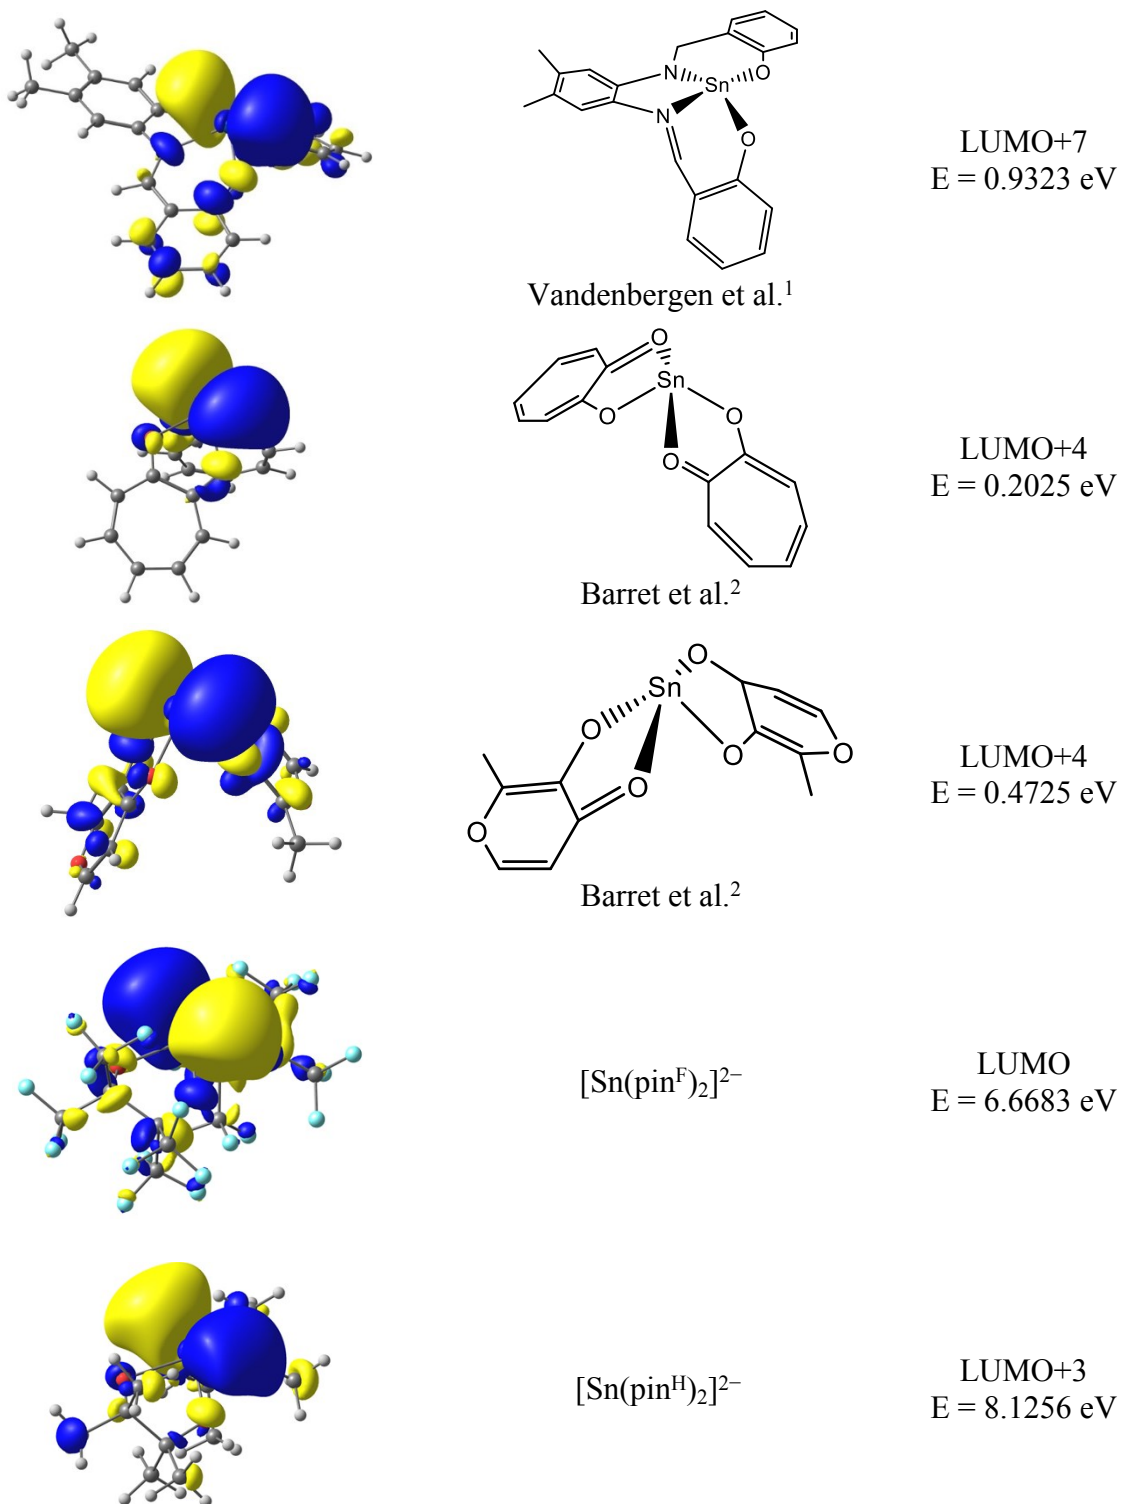

**Figure S9.** Calculated  $5p_x$  (CMO) energies (TPSS0/cc-pwCVTZ(Sn)-DK/cc-pVTZ-DK/DKH) of four-coordinate Sn(II) complexes optimized at the TPSSh/DEF2-TZVP/RIJCOSX/D3BJ level.

**Table S1.** Crystallographic data collection and structure refinement parameters for **1-5**.

|                                                 | <b>1</b>                                                                                                    | <b>2</b>                                                                                      | <b>3</b>                                                                                                     | <b>4</b>                                                                                    | <b>5</b>                                                                                                       |
|-------------------------------------------------|-------------------------------------------------------------------------------------------------------------|-----------------------------------------------------------------------------------------------|--------------------------------------------------------------------------------------------------------------|---------------------------------------------------------------------------------------------|----------------------------------------------------------------------------------------------------------------|
|                                                 | $[\text{Et}_3\text{NH}]_2[\text{Sn}(\text{pin}^{\text{F}})_3] \cdot 2$<br>( $\text{CH}_3$ ) <sub>2</sub> CO | $\text{K}_2[\text{Sn}(\text{pin}^{\text{F}})_3] \cdot 3$<br>( $\text{CH}_3$ ) <sub>2</sub> CO | $\{\text{K}(\text{18C6})\}_2[\text{Sn}(\text{pin}^{\text{F}})_3] \cdot$<br>( $\text{CH}_3$ ) <sub>2</sub> CO | $\text{K}_2[\text{Sn}(\text{pin}^{\text{F}})_2] \cdot 2$<br>C <sub>4</sub> H <sub>8</sub> O | $\{\text{K}(\text{15C5})_2\}_2[\text{Sn}(\text{pin}^{\text{F}})_2] \cdot 2$<br>C <sub>4</sub> H <sub>8</sub> O |
| Empirical formula                               | C <sub>36</sub> H <sub>44</sub> F <sub>36</sub> N <sub>2</sub> O <sub>8</sub> Sn                            | C <sub>27</sub> H <sub>18</sub> F <sub>36</sub> K <sub>2</sub> O <sub>9</sub> Sn              | C <sub>39</sub> H <sub>42</sub> F <sub>36</sub> K <sub>2</sub> O <sub>16</sub> Sn                            | C <sub>20</sub> H <sub>16</sub> F <sub>24</sub> K <sub>2</sub> O <sub>6</sub> Sn            | C <sub>60</sub> H <sub>96</sub> F <sub>24</sub> K <sub>2</sub> O <sub>26</sub> Sn                              |
| Formula weight                                  | 1435.42                                                                                                     | 1367.3                                                                                        | 1647.61                                                                                                      | 1005.22                                                                                     | 1886.25                                                                                                        |
| Temperature (K)                                 | 100.0                                                                                                       | 100.0                                                                                         | 100.0                                                                                                        | 100.0                                                                                       | 100.0                                                                                                          |
| Wavelength (Å)                                  | 0.71073                                                                                                     | 0.71073                                                                                       | 0.71073                                                                                                      | 0.71073                                                                                     | 0.71073                                                                                                        |
| Crystal system                                  | Triclinic                                                                                                   | Orthorhombic                                                                                  | Triclinic                                                                                                    | Monoclinic                                                                                  | Monoclinic                                                                                                     |
| Space group                                     | $P\bar{1}$                                                                                                  | Pccn                                                                                          | $P\bar{1}$                                                                                                   | C2/c                                                                                        | C2/c                                                                                                           |
| <i>a</i> (Å)                                    | 12.3859(9)                                                                                                  | 10.869(2)                                                                                     | 15.1378(16)                                                                                                  | 16.6806(14)                                                                                 | 27.5254(11)                                                                                                    |
| <i>b</i> (Å)                                    | 14.3035(11)                                                                                                 | 18.441(4)                                                                                     | 16.2438(16)                                                                                                  | 12.1477(10)                                                                                 | 10.7470(4)                                                                                                     |
| <i>c</i> (Å)                                    | 15.7748(13)                                                                                                 | 21.954(4)                                                                                     | 16.2454(16)                                                                                                  | 14.6638(13)                                                                                 | 28.7368(15)                                                                                                    |
| $\alpha$ (°)                                    | 82.239(2)                                                                                                   | 90                                                                                            | 99.540(3)                                                                                                    | 90                                                                                          | 90                                                                                                             |
| $\beta$ (°)                                     | 80.467(2)                                                                                                   | 90                                                                                            | 114.932(3)                                                                                                   | 95.237(5)                                                                                   | 114.007(2)                                                                                                     |
| $\gamma$ (°)                                    | 70.003(2)                                                                                                   | 90                                                                                            | 112.822(3)                                                                                                   | 90                                                                                          | 90                                                                                                             |
| Volume (Å <sup>3</sup> )                        | 2580.6(3)                                                                                                   | 4400.4(14)                                                                                    | 3068.9(5)                                                                                                    | 2958.9(4)                                                                                   | 7765.4(6)                                                                                                      |
| <i>Z</i>                                        | 2                                                                                                           | 4                                                                                             | 2                                                                                                            | 4                                                                                           | 4                                                                                                              |
| Density (calculated)<br>(g · cm <sup>-3</sup> ) | 1.85                                                                                                        | 2.06                                                                                          | 1.78                                                                                                         | 2.26                                                                                        | 1.61                                                                                                           |
| Absorption<br>coefficient (mm <sup>-1</sup> )   | 0.7                                                                                                         | 0.9                                                                                           | 0.7                                                                                                          | 1.3                                                                                         | 0.6                                                                                                            |
| F(000)                                          | 1424                                                                                                        | 2656                                                                                          | 1632                                                                                                         | 1952                                                                                        | 3872                                                                                                           |
| Crystal size mm <sup>3</sup>                    | 0.36 × 0.35 × 0.33                                                                                          | 0.25 x 0.22 x 0.18                                                                            | 0.3 × 0.28 × 0.26                                                                                            | 0.32 × 0.31 × 0.29                                                                          | 0.29 × 0.27 × 0.22                                                                                             |

|                                                           |                                                              |                                                             |                                                              |                                                              |                                                              |
|-----------------------------------------------------------|--------------------------------------------------------------|-------------------------------------------------------------|--------------------------------------------------------------|--------------------------------------------------------------|--------------------------------------------------------------|
| Theta range for data collection (°)                       | 1.764 to 28.320                                              | 1.855 to 28.364                                             | 1.480 to 25.421                                              | 2.077 to 28.361                                              | 1.620 to 26.418                                              |
| Index ranges                                              | $-16 \leq h \leq 13, -19 \leq k \leq 15, -21 \leq l \leq 21$ | $-14 \leq h \leq 14, -13 \leq k \leq 24, -29 \leq l \leq 9$ | $-18 \leq h \leq 14, -19 \leq k \leq 19, -19 \leq l \leq 19$ | $-22 \leq h \leq 17, -16 \leq k \leq 15, -19 \leq l \leq 16$ | $-34 \leq h \leq 34, -12 \leq k \leq 13, -26 \leq l \leq 35$ |
| Reflections collected                                     | 34045                                                        | 20285                                                       | 47361                                                        | 11885                                                        | 24929                                                        |
| Independent reflections                                   | 12802 [ $R_{\text{int}} = 0.0456$ ]                          | 5458 [ $R_{\text{int}} = 0.0376$ ]                          | 11297 [ $R_{\text{int}} = 0.0331$ ]                          | 676 [ $R_{\text{int}} = 0.0648$ ]                            | 7963 [ $R_{\text{int}} = 0.0581$ ]                           |
| Completeness to theta = 25.242°                           | 99.9%                                                        | 99.7 %                                                      | 99.9%                                                        | 99.7%                                                        | 99.9%                                                        |
| Absorption correction                                     | Semi-empirical from equivalents                              | Semi-empirical from equivalents                             | Semi-empirical from equivalents                              | Semi-empirical from equivalents                              | Semi-empirical from equivalents                              |
| Max. and min. transmission                                | 0.563 and 0.519                                              | 0.563 and 0.511                                             |                                                              | 0.746 and 0.683                                              | 0.745 and 0.695                                              |
| Refinement method                                         | Full-matrix least-squares on $F^2$                           | Full-matrix least-squares on $F^2$                          | Full-matrix least-squares on $F^2$                           | Full-matrix least-squares on $F^2$                           | Full-matrix least-squares on $F^2$                           |
| Data/parameters                                           | 12802/758                                                    | 5458/343                                                    | 11297/850                                                    | 3676/240                                                     | 7963/510                                                     |
| Goodness-of-fit on $F^2$                                  | 1.009                                                        | 1.268                                                       | 1.117                                                        | 1.026                                                        | 1.009                                                        |
| Final $R$ indices [ $I > 2\sigma(I)$ ]                    | $R1 = 0.0378, wR2 = 0.0664$                                  | $R1 = 0.0530, wR2 = 0.0921$                                 | $R1 = 0.0413, wR2 = 0.1084$                                  | $R1 = 0.0396, wR2 = 0.0932$                                  | $R1 = 0.0389, wR2 = 0.0708$                                  |
| $R$ indices (all data)                                    | $R1 = 0.0582, wR2 = 0.0734$                                  | $R1 = 0.0715, wR2 = 0.0969$                                 | $R1 = 0.0503, wR2 = 0.1146$                                  | $R1 = 0.0511, wR2 = 0.1013$                                  | $R1 = 0.0617, wR2 = 0.0783$                                  |
| Largest diff. peak and hole ( $e \cdot \text{\AA}^{-3}$ ) | 0.62 and -0.70                                               | 0.991 and -0.566                                            | 1.60 and -0.48                                               | 0.75 and -0.84                                               | 0.42 and -0.55                                               |
| SQUEEZE                                                   |                                                              |                                                             | Found: 35e/uc; calculated for acetone: 32e/uc                |                                                              |                                                              |

**Table S2.**  $^{119}\text{Sn}$  Moessbauer data plotted in Figure 3 in the main text.

| Compound                                                                            | CSD Code | Isomer Shift ( $\delta$ , mm/s) | Quadrupole Splitting ( $\Delta E_Q$ mm/s) | Reference |
|-------------------------------------------------------------------------------------|----------|---------------------------------|-------------------------------------------|-----------|
| 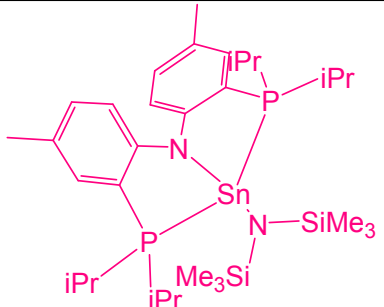   | XAWFUY   | 2.779(4)                        | 2.02(1)                                   | 3         |
| [Sn{N(SiMe <sub>3</sub> ) <sub>2</sub> } <sub>2</sub> ]                             | BUGROK   | 2.88                            | 3.52                                      | 3         |
|    | BOKBIN   | 2.884(13)                       | 2.356(13)                                 | 4         |
|   | BOKBOT   | 3.222(10)                       | 1.654(10)                                 | 4         |
|  | SASQUA   | 2.810 (5)                       | 2.290 (8)                                 | 5         |

|                                                                                                       |        |           |          |   |
|-------------------------------------------------------------------------------------------------------|--------|-----------|----------|---|
| 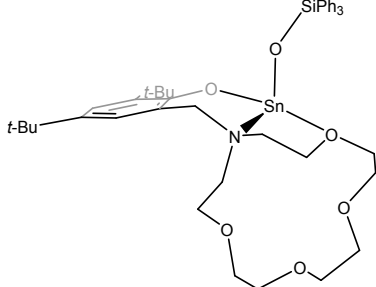                     | SASREL | 2.849 (8) | 2.09 (1) | 5 |
|                      | SASRAH | 2.77 (1)  | 2.09 (2) | 5 |
| $[\text{Sn}\{\text{N}^{\wedge}\text{O}\}][[\text{H}_2\text{N}\{\text{B}(\text{C}_6\text{F}_5)_3\}_2]$ |        | 3.37 (5)  | 1.91 (7) |   |
| $\text{Ar}'\text{Sn}-\text{Sn}\{\text{C}_6\text{H}_3-2,6(\text{C}_6\text{H}_3-2,6-\text{Pr}^i)_2\}$   | NEHTAW | 2.658(2)  | 2.995(2) | 6 |
|                     | BAXSUO | 2.69(3)   | 3.730(3) | 6 |
| $[\text{Cp}_2\text{Sn}]$                                                                              | BAHJAV | 3.73      | 0.65     | 7 |
| $[\text{Cp}^*_2\text{Sn}]$                                                                            | MCYPSN | 3.83      | 0        | 8 |
| $[\text{Sn}(\text{C}_7\text{H}_8)_3]^{2+}[\text{B}(\text{C}_6\text{F}_5)_4]_2$                        | IZUXAD | 4.14(1)   | 0.38(3)  | 9 |

**Computational details.** All calculations described in the following were performed with the ORCA electronic structure package.<sup>10-12</sup> Any calculations performed with another package are described in the main text. In the tables that follow, the calibration of the different theoretical models is described and the performance of the models with respect to duplicating the experimental quadrupolar splitting is shown. The calibration was done against the set described by Barone et al.<sup>13-15</sup> Geometries were optimized at the BP86<sup>16, 17</sup>/DEF2-SV(P)<sup>18, 19</sup>/D3BJ<sup>20, 21</sup> and TPSSh<sup>22</sup>/DEF2-TZVP/D3BJ/RIJCOSX<sup>23-25</sup> levels. Experimental geometries were modified by optimizing the hydrogen positions at the BP86/DEF2-SV(P)/D3BJ level. In All other relevant details are shown in the main text or the footnotes of the tables.

**Table S3. Summary of correlation plots of exp.  $|\Delta E|$  (mm s<sup>-1</sup>) vs. calc. values of  $|V|$  (a.u.).**

| Method                   | Basis Set                   | Structure              | Slope  | SE    | Intercept | SE    | R <sup>2</sup> |
|--------------------------|-----------------------------|------------------------|--------|-------|-----------|-------|----------------|
| BP86                     | DKH-TZVPP <sup>(iv)</sup>   | BP86 <sup>(i)</sup>    | 0.7280 | 0.045 | 0.08129   | 0.163 | 0.889          |
| TPSSh                    | DKH-TZVPP <sup>(iv)</sup>   | TPSSh <sup>(ii)</sup>  | 0.7216 | 0.045 | 0.07969   | 0.166 | 0.886          |
| TPSS0 <sup>26</sup>      | DKH-TZVPP <sup>(iv)</sup>   | TPSSh <sup>(ii)</sup>  | 0.6744 | 0.041 | 0.08801   | 0.161 | 0.892          |
| TPSSh                    | DKH-TZVPP <sup>(iv)</sup>   | Expt. <sup>(iii)</sup> | 0.7217 | 0.033 | -0.04064  | 0.125 | 0.938          |
| TPSS0                    | DKH-TZVPP <sup>(iv)</sup>   | Expt. <sup>(iii)</sup> | 0.6751 | 0.030 | -0.03725  | 0.119 | 0.943          |
| TPSS0                    | cc-pwCVTZ-DK <sup>(v)</sup> | TPSSh <sup>(ii)</sup>  | 0.6909 | 0.041 | 0.05123   | 0.159 | 0.897          |
| TPSS0                    | cc-pwCVTZ-DK <sup>(v)</sup> | Expt. <sup>(iii)</sup> | 0.6885 | 0.030 | -0.05976  | 0.119 | 0.944          |
| MP2 <sup>(vi)</sup>      | cc-pwCVTZ-DK <sup>(v)</sup> | Expt. <sup>(iii)</sup> | 0.6474 | 0.023 | 0.02941   | 0.092 | 0.964          |
| CCSD(T) <sup>(vii)</sup> | cc-pwCVTZ-DK <sup>(v)</sup> | Expt. <sup>(iii)</sup> | 0.5673 | 0.023 | 0.00261   | 0.107 | 0.952          |

- i. BP86/DEF2-SV(P)/D3BJ
- ii. TPSSh/DEF2-TZVP/D3BJ/RIJCOSX
- iii. Hydrogens optimized at the BP86/DEF2-SV(P)/D3BJ level.
- iv. In ORCA parlance, this is the old-DKH-TZVPP<sup>27</sup> basis set.
- v. Sn atoms modeled with cc-pwCVTZ-DK<sup>28</sup>, all other atoms modeled with cc-pVTZ-DK<sup>29</sup>.
- vi. Energies evaluated with Grimme's SCS-MP2<sup>30</sup> with RI approximation using the CC-PVTZ/C<sup>31</sup> auxiliary basis set for non-tin atoms, and ORCA's AutoAux<sup>32</sup> routine for Sn. Relaxed densities were used.
- vii. DLPNO-CCSD(T) with unrelaxed densities. Normal PNO thresholds were used.

**Table S4. Summary of model performance.**

| Method  | Basis Set    | Structure | K(THF) <sub>2</sub> [Sn <sup>II</sup> (pin <sup>F</sup> ) <sub>2</sub> ] | [Sn <sup>II</sup> (pin <sup>F</sup> ) <sub>2</sub> ] <sup>2-</sup> | $\Delta$ |
|---------|--------------|-----------|--------------------------------------------------------------------------|--------------------------------------------------------------------|----------|
| Expt.   | -            | -         | 1.698                                                                    | 2.153                                                              | 0.455    |
| TPSSh   | DKH-TZVPP    | TPSSh     | 1.813                                                                    | 1.851                                                              | 0.038    |
| TPSS0   | DKH-TZVPP    | TPSSh     | 1.817                                                                    | 1.824                                                              | 0.007    |
| TPSSh   | DKH-TZVPP    | Expt.     | 1.868                                                                    | 1.930                                                              | 0.062    |
| TPSS0   | DKH-TZVPP    | Expt.     | 1.846                                                                    | 1.925                                                              | 0.079    |
| TPSS0   | cc-pwCVTZ-DK | Expt.     | 1.849                                                                    | 1.940                                                              | 0.091    |
| MP2     | cc-pwCVTZ-DK | Expt.     | 1.639                                                                    | 1.785                                                              | 0.146    |
| CCSD(T) | cc-pwCVTZ-DK | Expt.     | 1.746                                                                    | 1.853                                                              | 0.107    |

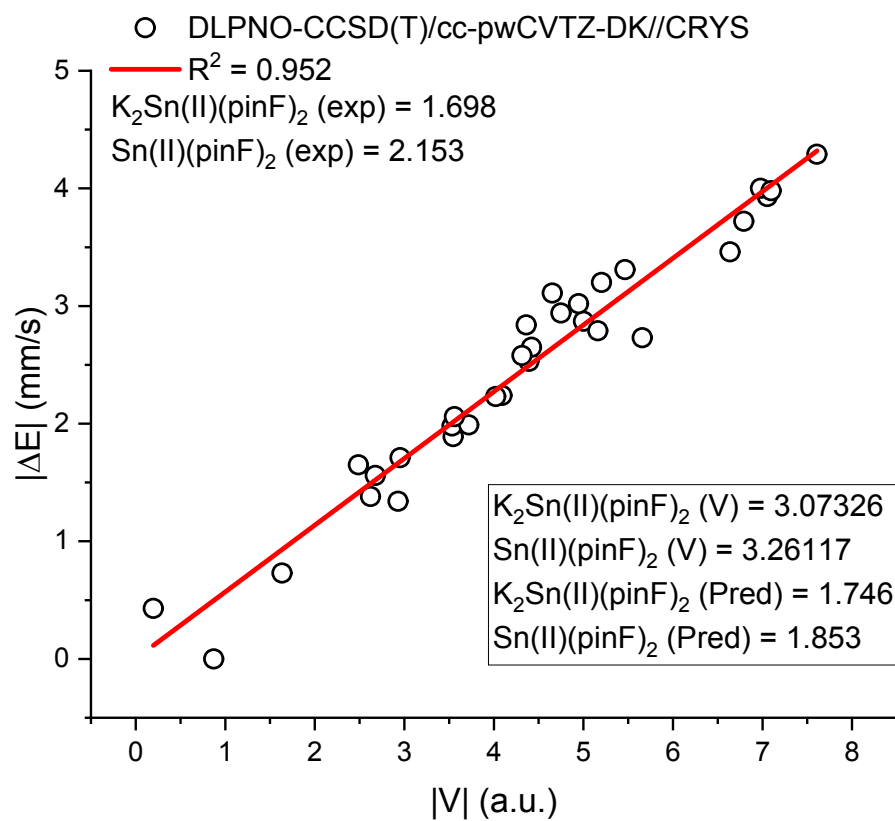

**Figure S10.** Calibration curve for DLPNO-CCSD/cc-pwCVTZ-DK(Sn)/cc-pVTZ-DK/DKH/RIJCOSX/AutoAux//Expt.



## References:

1. A. M. Vandenberg, J. D. Cashion, G. D. Fallon and B. O. West, *Aust. J. Chem.*, 1990, **43**, 1559-1571.
2. M. C. Barret, M. F. Mahon, K. C. Molloy, J. W. Steed and P. Wright, *Inorg. Chem.*, 2001, **40**, 4384-4388.
3. J. Henning, H. Schubert, K. Eichele, F. Winter, R. Poettgen, H. A. Mayer and L. Wesemann, *Inorg. Chem.*, 2012, **51**, 5787-5794.
4. W. A. Merrill, J. Steiner, A. Betzer, I. Nowik, R. Herber and P. P. Power, *Dalton Trans.*, 2008, DOI: 10.1039/b809671f, 5905-5910.
5. V. Poirier, T. Roisnel, S. Sinbandhit, M. Bochmann, J.-F. Carpentier and Y. Sarazin, *Chem. - Eur. J.*, 2012, **18**, 2998-3013, S2998/2991-S2998/2921.
6. G. H. Spikes, J. R. Giuliani, M. P. Augustine, I. Nowik, R. H. Herber and P. P. Power, *Inorg. Chem.*, 2006, **45**, 9132-9136.
7. R. L. Williamson and M. B. Hall, *Organometallics*, 1986, **5**, 2142-2143.
8. M. J. Heeg, C. Janiak and J. J. Zuckerman, *J. Am. Chem. Soc.*, 1984, **106**, 4259-4261.
9. A. Schaefer, F. Winter, W. Saak, D. Haase, R. Poettgen and T. Mueller, *Chem. - Eur. J.*, 2011, **17**, 10979-10984, S10979/10971-S10979/10912.
10. F. Neese, *Wiley Interdiscip. Rev. Comput. Mol. Sci.*, 2012, **2**, 73-78.
11. F. Neese, *Max Planck Institute for Chemical Energy Conversion: Mülheim a. d. Ruhr, Germany*, 2017.
12. F. Neese, *Wiley Interdiscip. Rev. Comput. Mol. Sci.*, 2018, **8**, e1327.
13. G. Barone, A. Silvestri, G. Ruisi and G. L. Manna, *Chem. Eur. J.*, 2005, **11**, 6185-6191.
14. G. Barone, R. Mastalerz, M. Reiher and R. Lindh, *J. Phys. Chem. A*, 2008, **112**, 1666-1672.
15. J. W. Krogh, G. Barone and R. Lindh, *Chemistry*, 2006, **12**, 5116-5121.
16. A. D. Becke, *Phys. Rev. A*, 1988, **38**, 3098-3100.
17. J. P. Perdew, *Phys. Rev. B*, 1986, **33**, 8822-8824.
18. F. Weigend and R. Ahlrichs, *Physical Chemistry Chemical Physics*, 2005, **7**, 3297-3305.
19. F. Weigend, *Physical Chemistry Chemical Physics*, 2006, **8**, 1057-1065.
20. S. Grimme, J. Antony, S. Ehrlich and H. Krieg, *J. Chem. Phys.*, 2010, **132**, 154104.
21. S. Grimme, S. Ehrlich and L. Goerigk, *J. Comput. Chem.*, 2011, **32**, 1456-1465.
22. J. Tao, J. P. Perdew, V. N. Staroverov and G. E. Scuseria, *Phys. Rev. Lett.*, 2003, **91**, 146401.
23. D. Ganyushin, N. Gilka, P. R. Taylor, C. M. Marian and F. Neese, *J. Chem. Phys.*, 2010, **132**, 144111.
24. S. Kossmann and F. Neese, *Chem. Phys. Lett.*, 2009, **481**, 240-243.
25. F. Neese, F. Wennmohs, A. Hansen and U. Becker, *Chem. Phys.*, 2009, **356**, 98-109.
26. S. Grimme, *J. Phys. Chem.*, 2005, **109**, 3067-3077.
27. D. A. Pantazis, X. Y. Chen, C. R. Landis and F. Neese, *J. Chem. Theory Comput.*, 2008, **4**, 908-919.
28. D. H. Bross and K. A. Peterson, *Theor. Chem. Acc.*, 2013, **133**, 1434.
29. W. A. d. Jong, R. J. Harrison and D. A. Dixon, *J. Chem. Phys.*, 2001, **114**, 48-53.
30. S. Grimme, *J. Chem. Phys.*, 2003, **118**, 9095-9102.
31. F. Weigend, A. Köhn and C. Hättig, *J. Chem. Phys.*, 2002, **116**, 3175-3183.

32. G. L. Stoychev, A. A. Auer and F. Neese, *J. Chem. Theory Comput.*, 2017, **13**, 554-562.
